# Supplementary material for: Proteomic Profiling Identifies Candidate Diagnostic Biomarkers of Hydrosalpinx in Endometrial Fluid: A Pilot Study
Source: MDPI journal article supplement (doi:10.3390/ijms25020968), 2024-01-12
Supplement: s1 [file s1]

**Table S4. Proteins with significant fold change in abundance between hydrosalpinx cyst fluid and post-salpingectomy endometrial fluid.**

| Accession Code | Protein Name | Protein description                                                    | p-value | FC (HCF vs. post-salpingectomy EF) |
|----------------|--------------|------------------------------------------------------------------------|---------|------------------------------------|
| O95969         | SG1D2        | Secretoglobin family 1D member 2                                       | 0.023   | 1.98                               |
| P60891         | PRPS1        | Ribose-phosphate pyrophosphokinase 1                                   | 0.043   | 1.71                               |
| Q92530         | PSMF1        | Proteasome inhibitor PI31 subunit                                      | 0.040   | 1.38                               |
| P27169         | PON1         | Serum paraoxonase/arylesterase 1                                       | 0.025   | -1.33                              |
| P19823         | ITIH2        | Inter-alpha-trypsin inhibitor heavy chain H2                           | 0.014   | -1.37                              |
| P00734         | THRB         | Prothrombin                                                            | 0.010   | -1.43                              |
| P35858         | ALS          | Insulin-like growth factor-binding protein complex acid labile subunit | 0.007   | -1.56                              |
| P05090         | APOD         | Apolipoprotein D                                                       | 0.004   | -1.56                              |
| P00747         | PLMN         | Plasminogen                                                            | 0.019   | -1.59                              |
| P08236         | BGLR         | Beta-glucuronidase                                                     | 0.024   | -1.61                              |
| Q96G03         | PGM2         | Phosphoglucomutase-2                                                   | 0.031   | -1.61                              |
| P15169         | CBPN         | Carboxypeptidase N catalytic chain                                     | 0.025   | -1.79                              |
| P30085         | KCY          | UMP-CMP kinase                                                         | 0.037   | -2.00                              |
| Q08211         | DHX9         | ATP-dependent RNA helicase A                                           | 0.038   | -2.08                              |
| Q86Z20         | CC125        | Coiled-coil domain-containing protein 125                              | 0.040   | -2.08                              |
| Q99536         | VAT1         | Synaptic vesicle membrane protein VAT-1 homolog                        | 0.026   | -2.22                              |
| Q15582         | BGH3         | Transforming growth factor-beta-induced protein ig-h3                  | 0.050   | -2.38                              |
| Q15113         | PCOC1        | Procollagen C-endopeptidase enhancer 1                                 | 0.032   | -2.63                              |
| O14773         | TPP1         | Tripeptidyl-peptidase 1                                                | 0.042   | -2.70                              |
| Q01995         | TAGL         | Transgelin                                                             | 0.045   | -4.00                              |

The table lists the accession codes obtained from Swissprot protein database protein name and description, p-values from pair-wise comparison, and the fold change (FC) of protein abundance in post-salpingectomy endometrial fluid (EF) with respect to hydrosalpinx cyst fluid (HCF).
