# Supplementary material for: Proteomic Profiling Identifies Candidate Diagnostic Biomarkers of Hydrosalpinx in Endometrial Fluid: A Pilot Study
Source: MDPI journal article supplement (doi:10.3390/ijms25020968), 2024-01-12
Supplement: s1 [file s1]

**Table S5. Endometrial fluid proteins with significant fold change in abundance following salpingectomy.**

| Accession Code | Protein Name | Protein description                                      | p-value | FC (pre- vs. post-salpingectomy EF) |
|----------------|--------------|----------------------------------------------------------|---------|-------------------------------------|
| Q7L266         | ASGL1        | Isoaspartyl peptidase/L-asparaginase                     | 0.021   | 14.57                               |
| Q13421         | MSLN         | Mesothelin                                               | 0.044   | 12.22                               |
| P54108         | CRIS3        | Cysteine-rich secretory protein 3                        | 0.017   | 10.29                               |
| P10909         | CLUS         | Clusterin                                                | 0.013   | 9.70                                |
| Q53GD3         | CTL4         | Choline transporter-like protein 4                       | 0.010   | 6.57                                |
| Q08380         | LG3BP        | Galectin-3-binding protei                                | 0.034   | 6.42                                |
| Q9NPH2         | INO1         | Inositol-3-phosphate synthase 1                          | 0.031   | 5.83                                |
| Q13938         | CAYP1        | Calcyphosin                                              | 0.037   | 5.71                                |
| Q9BW30         | TPPP3        | Tubulin polymerization-promoting protein family member 3 | 0.045   | 5.62                                |
| P08294         | SODE         | Extracellular superoxide dismutase [Cu-Zn]               | 0.033   | 5.18                                |
| P12821         | ACE          | Angiotensin-converting enzyme                            | 0.044   | 4.45                                |
| P41222         | PTGDS        | Prostaglandin-H2 D-isomerase                             | 0.009   | 4.01                                |
| Q5VW32         | BROX         | BRO1 domain-containing protein BROX                      | 0.015   | 3.67                                |
| O00560         | SDCB1        | Syntenin-1                                               | 0.013   | 3.33                                |
| Q86WI1         | PKHL1        | Fibrocystin-L                                            | 0.010   | 3.24                                |
| P20827         | EFNA1        | Ephrin-A1                                                | 0.042   | 3.14                                |
| P15311         | EZRI         | Ezrin                                                    | 0.039   | 3.09                                |
| P36222         | CH3L1        | Chitinase-3-like protein 1                               | 0.011   | 2.93                                |
| P00966         | ASSY         | Argininosuccinate synthase                               | 0.032   | 2.83                                |
| Q16651         | PRSS8        | Prostasin                                                | 0.018   | 2.82                                |
| P48506         | GSH1         | Glutamate--cysteine ligase catalytic subunit             | 0.008   | 2.79                                |
| O94760         | DDAH1        | N(G),N(G)-dimethylarginine dimethylaminohydrolase 1      | 0.049   | 2.76                                |
| Q14393         | GAS6         | Growth arrest-specific protein 6                         | 0.039   | 2.74                                |
| P15941         | MUC1         | Mucin-1                                                  | 0.038   | 2.43                                |
| P13987         | CD59         | CD59 glycoprotein                                        | 0.025   | 2.36                                |
| P43251         | BTD          | Biotinidase                                              | 0.025   | 2.25                                |
| Q8N2S1         | LTBP4        | Latent-transforming growth factor beta-binding protein 4 | 0.034   | 2.25                                |
| P0DMV9         | HS71B        | Heat shock 70 kDa protein 1B                             | 0.016   | 2.21                                |
| O60888         | CUTA         | Protein CutA                                             | 0.047   | 2.19                                |
| Q9UBQ7         | GRHPR        | Glyoxylate reductase/hydroxypyruvate reductase           | 0.049   | 2.13                                |
| Q9Y265         | RUVB1        | RuvB-like 1                                              | 0.042   | 2.06                                |
| P00568         | KAD1         | Adenylate kinase isoenzyme 1                             | 0.027   | 1.97                                |
| P61916         | NPC2         | NPC intracellular cholesterol transporter 2              | 0.050   | 1.91                                |
| P04632         | CPNS1        | Calpain small subunit 1                                  | 0.020   | 1.83                                |
| P07225         | PROS         | Vitamin K-dependent protein S                            | 0.017   | 1.80                                |
| P22061         | PIMT         | Protein-L-isoaspartate(D-aspartate) O-methyltransferase  | 0.050   | 1.80                                |
| Q10588         | BST1         | ADP-ribosyl cyclase/cyclic ADP-ribose hydrolase 2        | 0.034   | 1.70                                |
| P25774         | CATS         | Cathepsin S                                              | 0.019   | 1.69                                |
| Q14254         | FLOT2        | Flotillin-2                                              | 0.049   | 1.65                                |

|        |       |                                                                        |        |       |
|--------|-------|------------------------------------------------------------------------|--------|-------|
| O43490 | PROM1 | Prominin-1                                                             | 0.045  | 1.61  |
| P02753 | RET4  | Retinol-binding protein 4                                              | 0.028  | -1.35 |
| P02766 | TTHY  | Transthyretin                                                          | 0.009  | -1.43 |
| P02747 | C1QC  | Complement C1q subcomponent subunit C                                  | 0.048  | -1.49 |
| P05546 | HEP2  | Heparin cofactor 2                                                     | 0.041  | -1.54 |
| P01031 | CO5   | Complement C5                                                          | 0.011  | -1.56 |
| P02760 | AMBP  | Protein AMBP                                                           | 0.043  | -1.61 |
| P19827 | ITIH1 | Inter-alpha-trypsin inhibitor heavy chain H1                           | 0.002  | -1.64 |
| O95445 | APOM  | Apolipoprotein M                                                       | 0.009  | -1.67 |
| Q9BXS6 | NUSAP | Nucleolar and spindle-associated protein 1                             | 0.022  | -1.69 |
| P00734 | THRB  | Prothrombin                                                            | 0.001  | -1.69 |
| P27169 | PON1  | Serum paraoxonase/arylesterase 1                                       | <0.001 | -1.79 |
| P04114 | APOB  | Apolipoprotein B-100                                                   | 0.019  | -1.79 |
| P07357 | CO8A  | Complement component C8 alpha chain                                    | 0.049  | -1.82 |
| P05090 | APOD  | Apolipoprotein D                                                       | 0.001  | -1.89 |
| P19823 | ITIH2 | Inter-alpha-trypsin inhibitor heavy chain H2                           | <0.001 | -1.92 |
| P01023 | A2MG  | Alpha-2-macroglobulin                                                  | 0.047  | -1.92 |
| P36871 | PGM1  | Phosphoglucomutase-1                                                   | 0.042  | -2.04 |
| P03952 | KLKB1 | Plasma kallikrein                                                      | 0.010  | -2.04 |
| P15169 | CBPN  | Carboxypeptidase N catalytic chain                                     | 0.018  | -2.04 |
| P02656 | APOC3 | Apolipoprotein C-III                                                   | 0.020  | -2.08 |
| P02745 | C1QA  | Complement C1q subcomponent subunit A                                  | 0.032  | -2.08 |
| P00747 | PLMN  | Plasminogen                                                            | 0.003  | -2.13 |
| P35858 | ALS   | Insulin-like growth factor-binding protein complex acid labile subunit | <0.001 | -2.13 |
| P51884 | LUM   | Lumican                                                                | 0.011  | -2.17 |
| P08236 | BGLR  | Beta-glucuronidase                                                     | 0.002  | -2.27 |
| P67936 | TPM4  | Tropomyosin alpha-4 chain                                              | 0.033  | -2.33 |
| P02647 | APOA1 | Apolipoprotein A-I                                                     | 0.001  | -2.63 |
| P02671 | FIBA  | Fibrinogen alpha chain                                                 | 0.007  | -2.70 |
| P02675 | FIBB  | Fibrinogen beta chain                                                  | 0.038  | -2.70 |
| P00738 | HPT   | Haptoglobin                                                            | 0.046  | -3.03 |
| P02679 | FIBG  | Fibrinogen gamma chain                                                 | 0.043  | -3.13 |
| P02538 | K2C6A | Keratin, type II cytoskeletal 6A                                       | 0.043  | -3.70 |
| Q9BRX8 | PXL2A | Peroxiredoxin-like 2A                                                  | 0.041  | -4.17 |
| P08572 | CO4A2 | Collagen alpha-2(IV) chain                                             | 0.049  | -4.17 |
| Q13509 | TBB3  | Tubulin beta-3 chain                                                   | 0.043  | -6.67 |

The table lists the accession codes obtained from Swissprot protein database protein name and description, p-values from pair-wise comparison, and the fold change (FC) of protein abundance in pre-salpingectomy endometrial fluid (EF) with respect to post-salpingectomy endometrial fluid (EF).
