# Supplementary material for: Proteomic Profiling Identifies Candidate Diagnostic Biomarkers of Hydrosalpinx in Endometrial Fluid: A Pilot Study
Source: MDPI journal article supplement (doi:10.3390/ijms25020968), 2024-01-12
Supplement: s1 [file s1]

**Table S2. Proteins with significant fold change in abundance between hydrosalpinx cyst fluid and pre-salpingectomy endometrial fluid.**

| Accession Code | Protein Name | Protein description                                              | p-value | FC (HCF vs. pre-salpingectomy EF) |
|----------------|--------------|------------------------------------------------------------------|---------|-----------------------------------|
| P18206         | VINC         | Vinculin                                                         | 0.037   | 1.51                              |
| P0DOX3         | IGD          | Immunoglobulin delta heavy chain                                 | 0.016   | 1.48                              |
| P19823         | ITIH2        | Inter-alpha-trypsin inhibitor heavy chain H2                     | 0.040   | 1.40                              |
| P01031         | CO5          | Complement C5                                                    | 0.042   | 1.27                              |
| P63000         | RAC1         | Ras-related C3 botulinum toxin substrate 1                       | 0.035   | -1.54                             |
| P28066         | PSA5         | Proteasome subunit alpha type-5                                  | 0.046   | -1.54                             |
| P22234         | PUR6         | Multifunctional protein ADE2                                     | 0.035   | -1.56                             |
| P04632         | CPNS1        | Calpain small subunit 1                                          | 0.032   | -1.69                             |
| Q96G03         | PGM2         | Phosphoglucomutase-2                                             | 0.014   | -1.89                             |
| P62879         | GBB2         | Guanine nucleotide-binding protein G(I)/G(S)/G(T) subunit beta-2 | 0.042   | -2.04                             |
| P23381         | SYWC         | Tryptophan--tRNA ligase, cytoplasmic                             | 0.008   | -2.04                             |
| Q07960         | RHG01        | Rho GTPase-activating protein 1                                  | 0.041   | -2.08                             |
| P48637         | GSHB         | Glutathione synthetase                                           | 0.015   | -2.17                             |
| Q9NWX4         | PHP14        | 14 kDa phosphohistidine phosphatase                              | 0.038   | -2.27                             |
| P0DMV9         | HS71B        | Heat shock 70 kDa protein 1B                                     | 0.014   | -2.33                             |
| Q08211         | DHX9         | ATP-dependent RNA helicase A                                     | 0.024   | -2.33                             |
| P00966         | ASSY         | Argininosuccinate synthase                                       | 0.038   | -2.63                             |
| O14773         | TPP1         | Tripeptidyl-peptidase 1                                          | 0.020   | -2.63                             |
| O94760         | DDAH1        | N(G),N(G)-dimethylarginine dimethylaminohydrolase 1              | 0.040   | -3.03                             |
| Q96TA1         | NIBA2        | Protein Niban 2                                                  | 0.011   | -3.03                             |
| Q01995         | TAGL         | Transgelin                                                       | 0.010   | -3.13                             |
| P68371         | TBB4B        | Tubulin beta-4B chain                                            | 0.047   | -3.85                             |
| Q9NPH2         | INO1         | Inositol-3-phosphate synthase 1                                  | 0.038   | -5.00                             |

The table lists the accession codes obtained from Swissprot protein database protein name and description, p-values from pair-wise comparison, and the fold change (FC) of protein abundance in pre-salpingectomy endometrial fluid (EF) with respect to hydrosalpinx cyst fluid (HCF).
